# Supplementary material for: Calculation for tensile strength and fracture toughness of granite with three kinds of grain sizes using three-point-bending test
Source: PLoS One. 2018 Mar 29;13(3):e0180880. doi: 10.1371/journal.pone.0180880 (PMC5875745; doi:10.1371/journal.pone.0180880)
Supplement: S3 File — (XLSX) [file pone.0180880.s003.xlsx]

## Sheet: Sheet1
0.01754	0.02053	0.00272	0.00868	0.00942	0.01019
0.91897	0.02091	0.92011	0.01015	0.92499	0.01069
0.90693	0.01196	0.92106	0.01318	0.91765	0.01381
0.91259	0.00733	0.90886	0.02427	0.89582	0.02431
1.65024	0.0094	1.65416	0.02678	1.65519	0.02668
1.65961	0.01267	1.65885	0.01674	1.66144	0.0166
1.65598	0.02161	1.66531	0.01234	1.66079	0.01244
2.28055	0.01654	2.26033	0.01046	2.26454	0.02043
2.25541	0.01306	2.25364	0.01412	2.2793	0.01471
2.26102	0.00833	2.25551	0.02008	2.26321	0.01191
2.60086	0.01576	2.60086	0.02176	2.58414	0.01263
2.59027	0.01297	2.59027	0.01297	2.59237	0.01523
2.58958	0.01077	2.58958	0.01077	2.59255	0.01637
3.24389	0.01523	3.25704	0.01496	3.24274	0.02114
3.25103	0.01376	3.25061	0.01946	3.24247	0.01937
3.25684	0.00944	3.25124	0.02144	3.24178	0.01501
3.47017	0.01312	3.465	0.02835	3.4687	0.015
3.47155	0.01606	3.47008	0.01956	3.46254	0.0256
3.46609	0.02112	3.4609	0.01527	3.48643	0.02831
3.47482	0.02301	3.89213	0.0159	3.89187	0.01905
3.89213	0.0159	3.89321	0.01935	3.89163	0.01749
3.89321	0.01935	3.90321	0.02139	3.87578	0.01624
3.89521	0.01754	--	--	--	--
